# Supplementary material
Source: PubMed Central journal article supplement (PMC8188401)
Supplement: NIHMS1707119-supplement-supinfo.pdf [file NIHMS1707119-supplement-supinfo.pdf]

## Online Supplement

The Online Table lists all genes with at least one variant detected from 2006-2017. “Variants of interest” include pathogenic (P), likely pathogenic (LP), and variants of uncertain significance (VUS).

| Variants of Interest      | Gene        | Number of variants |     |
|---------------------------|-------------|--------------------|-----|
|                           |             | LP/P               | VUS |
| > 10 variants of interest | KCNQ1       | 75                 | 20  |
|                           | SCN5A       | 30                 | 15  |
|                           | KCNH2       | 23                 | 12  |
|                           | MYH7        | 19                 | 12  |
|                           | MYBPC3      | 18                 | 13  |
|                           | TTN         | 12                 | 20  |
|                           | TNNT2       | 8                  | 4   |
|                           | RYR2        | 2                  | 21  |
|                           | DSP         | 0                  | 12  |
| 5-9 variants of interest  | LMNA        | 6                  | 1   |
|                           | TPM1        | 5                  | 2   |
|                           | NKX2.5      | 5                  | 0   |
|                           | HCN4        | 3                  | 5   |
|                           | ALMS1       | 3                  | 3   |
|                           | MYL2        | 3                  | 2   |
|                           | KCNJ2       | 2                  | 3   |
|                           | DES         | 1                  | 5   |
|                           | ANK2        | 0                  | 9   |
|                           | MYH6        | 0                  | 6   |
|                           | LDB3 (ZASP) | 0                  | 5   |
|                           | MYPN        | 0                  | 5   |
|                           | NEBL        | 0                  | 5   |
|                           | RBM20       | 0                  | 5   |
| SGCD                      | 0           | 5                  |     |
| 2-4 variants of interest  | CASQ2       | 3                  | 1   |
|                           | CALM1       | 3                  | 0   |
|                           | GLA         | 2                  | 1   |
|                           | TNNI3       | 2                  | 1   |
|                           | VCL         | 2                  | 1   |
|                           | CSRFP3      | 2                  | 0   |
|                           | SCO2        | 2                  | 0   |
|                           | SOS1        | 2                  | 0   |
|                           | TTR         | 2                  | 0   |
|                           | PKP2        | 1                  | 3   |

| Variants of Interest                 | Gene         | LP/P | VUS |
|--------------------------------------|--------------|------|-----|
| 2-4 variants of interest (continued) | ACTN2        | 1    | 2   |
|                                      | CACNA1C      | 1    | 2   |
|                                      | DSG2         | 1    | 2   |
|                                      | BAG3         | 1    | 1   |
|                                      | GJA5         | 1    | 0   |
|                                      | LAMA4        | 0    | 4   |
|                                      | DMD          | 0    | 3   |
|                                      | DSC2         | 0    | 3   |
|                                      | ILK          | 0    | 3   |
|                                      | ABCC9        | 0    | 2   |
|                                      | AKAP9        | 0    | 2   |
|                                      | CAV3         | 0    | 2   |
|                                      | FKTN         | 0    | 2   |
|                                      | FLNC         | 0    | 2   |
|                                      | GAA          | 0    | 2   |
|                                      | NEXN         | 0    | 2   |
|                                      | PDLIM3       | 0    | 2   |
|                                      | PRKAG2       | 0    | 2   |
|                                      | RAF1         | 0    | 2   |
|                                      | SCN10A       | 0    | 2   |
| TMEM43                               | 0            | 2    |     |
| TMPO                                 | 0            | 2    |     |
| 1 variant of interest                | KCNE1        | 1    | 0   |
|                                      | MTTS2        | 1    | 0   |
|                                      | NDUFB9       | 1    | 0   |
|                                      | NDUFV1       | 1    | 0   |
|                                      | PRDM16       | 1    | 0   |
|                                      | SCN8A        | 1    | 0   |
|                                      | TAZ          | 1    | 0   |
|                                      | TPM2         | 1    | 0   |
|                                      | TRPM4        | 1    | 0   |
|                                      | ACTC (ACTC1) | 0    | 1   |
|                                      | AGL          | 0    | 1   |
|                                      | CACNB2       | 0    | 1   |
|                                      | CHRM2        | 0    | 1   |
|                                      | CTF1         | 0    | 1   |
|                                      | EMD          | 0    | 1   |
|                                      | FHL1         | 0    | 1   |
|                                      | FKRP         | 0    | 1   |
|                                      | JPH2         | 0    | 1   |

| <b>Variants of Interest</b>                        | <b>Gene</b> | <b>LP/P</b> | <b>VUS</b> |
|----------------------------------------------------|-------------|-------------|------------|
| 1 variant of interest<br>(continued)               | LRPPRC      | 0           | 1          |
|                                                    | MTND5       | 0           | 1          |
|                                                    | NPPA        | 0           | 1          |
|                                                    | NRAS        | 0           | 1          |
|                                                    | TCAP        | 0           | 1          |
|                                                    | TRDN        | 0           | 1          |
|                                                    | TXNRD2      | 0           | 1          |
| No variants of<br>interest (only LB/B<br>variants) | C8ORF38     |             |            |
|                                                    | DTNA        |             |            |
|                                                    | JUP         |             |            |
|                                                    | KCNJ5       |             |            |
|                                                    | LAMP2       |             |            |
|                                                    | MT-ATP6     |             |            |
|                                                    | MTND6       |             |            |
|                                                    | MTTK        |             |            |
|                                                    | SCN1B       |             |            |
|                                                    | SNTA1       |             |            |
